# Supplementary material for: Darvadstrocel for Complex Perianal Fistulas in Japanese Adults with Crohn’s Disease: A Phase 3 Study
Source: PubMed Central journal article supplement — J Crohns Colitis. 2022 Sep 23;17(3):369–78. doi: 10.1093/ecco-jcc/jjac144 (PMC10069615; doi:10.1093/ecco-jcc/jjac144), 2022-09-23

**Supplementary Figure 2.** Change (mean, SD) from baseline in Perianal Disease Activity Index (A) total score, (B) discharge, (C) pain/restriction of activities, (D) restriction of sexual Activity, (E) type of perianal disease, (F) degree of induration

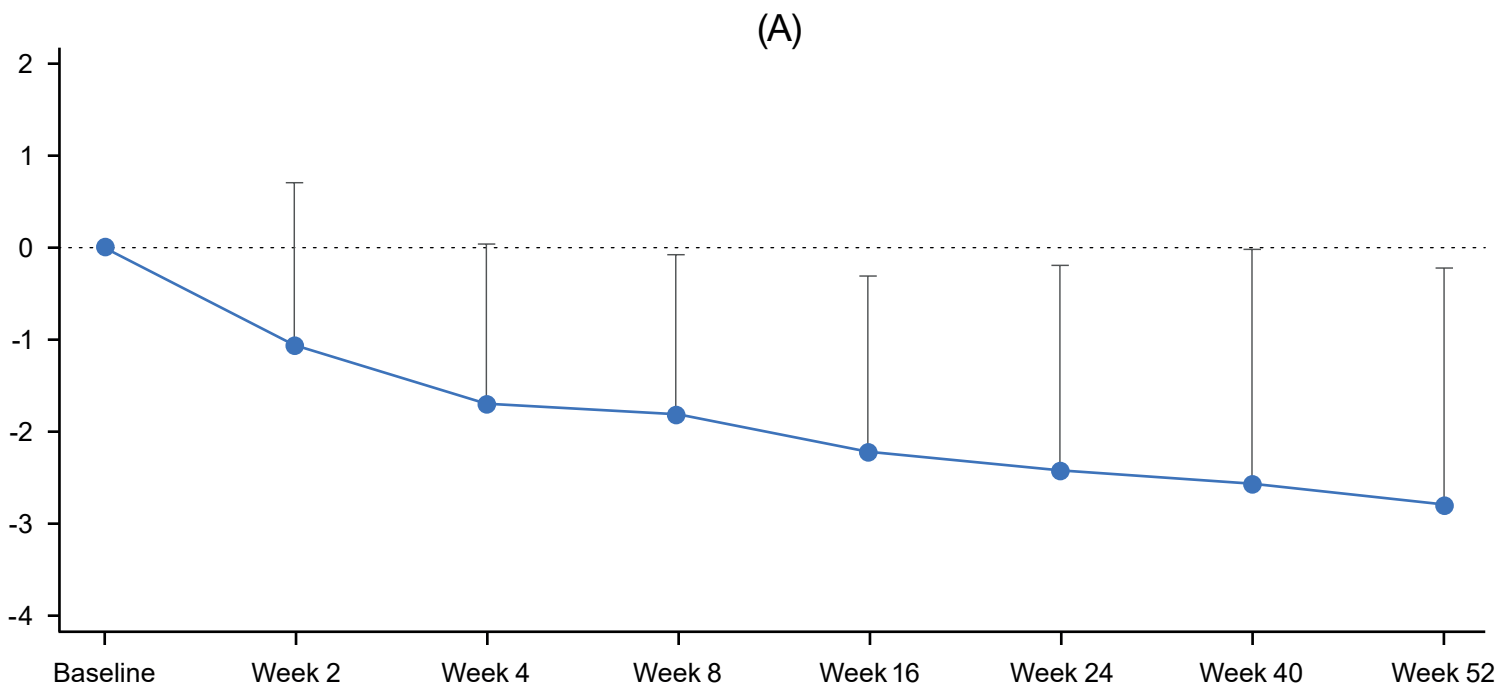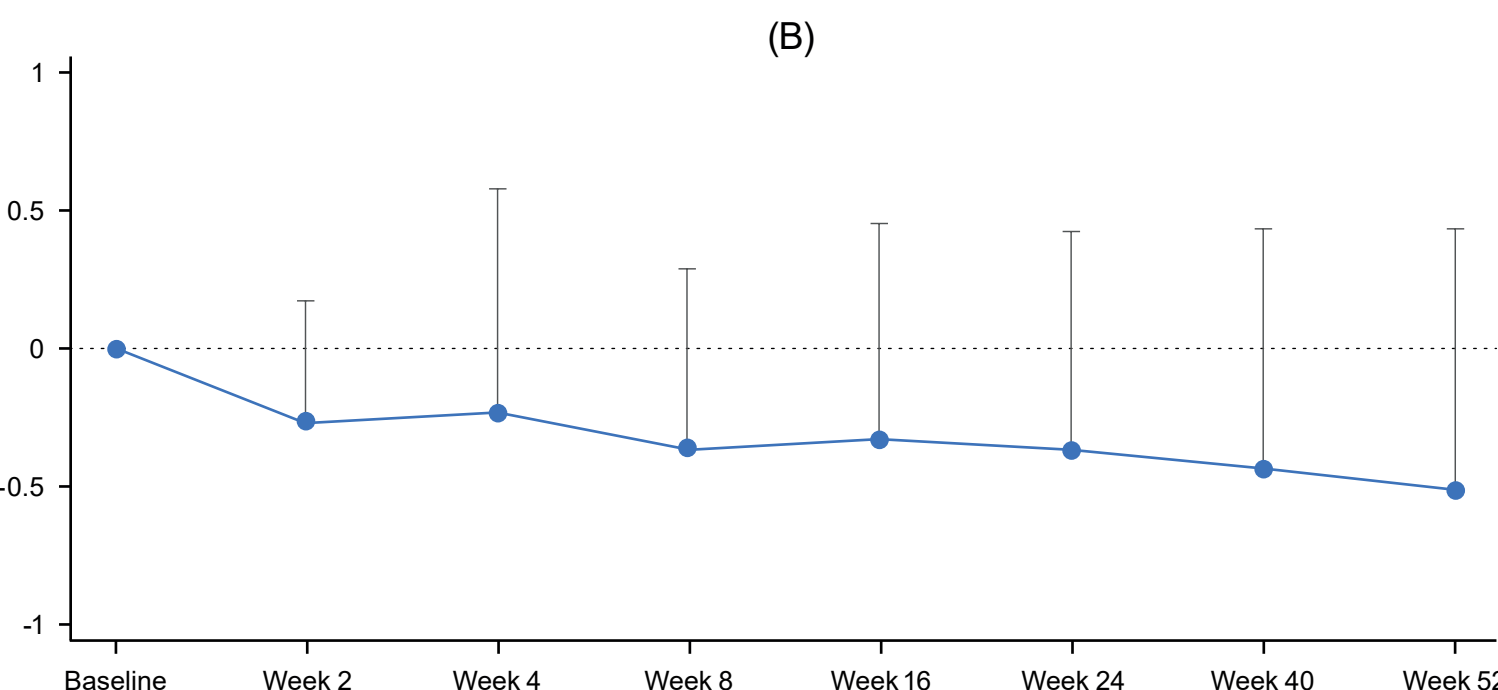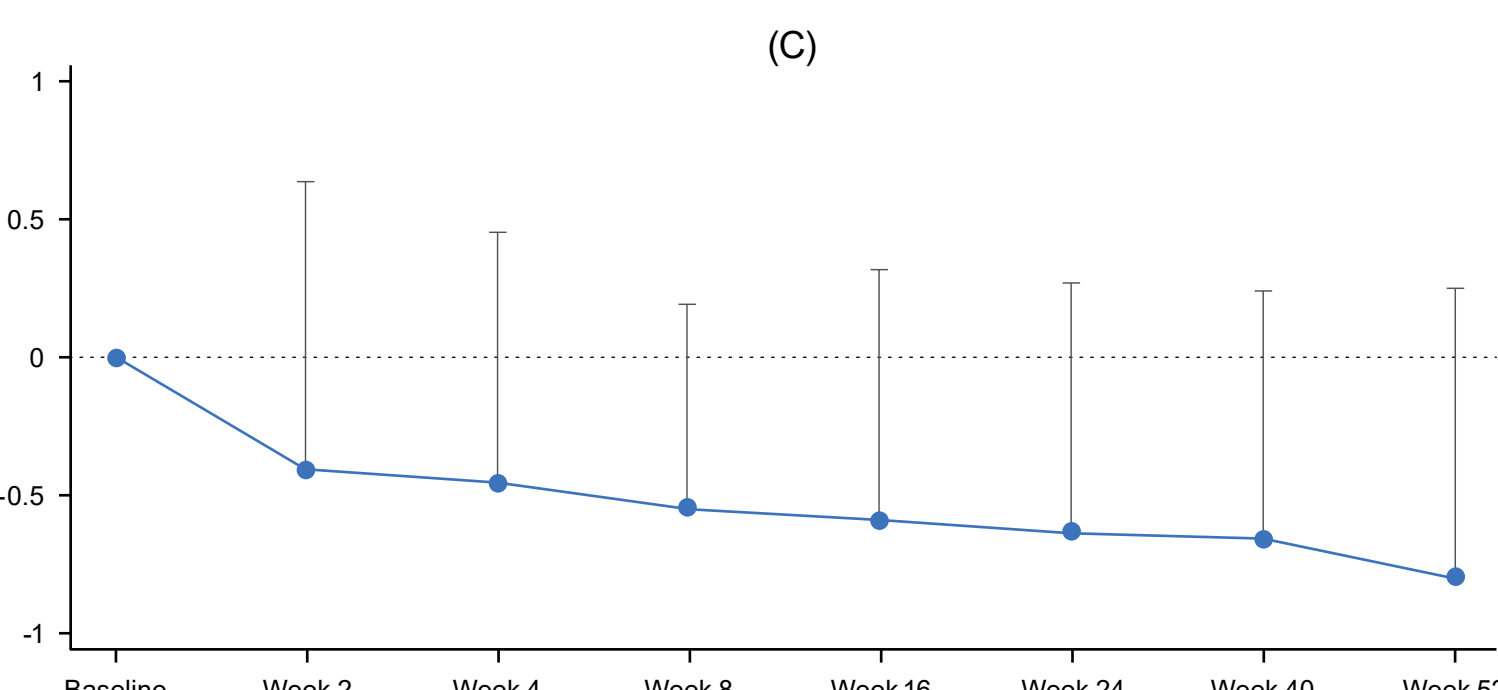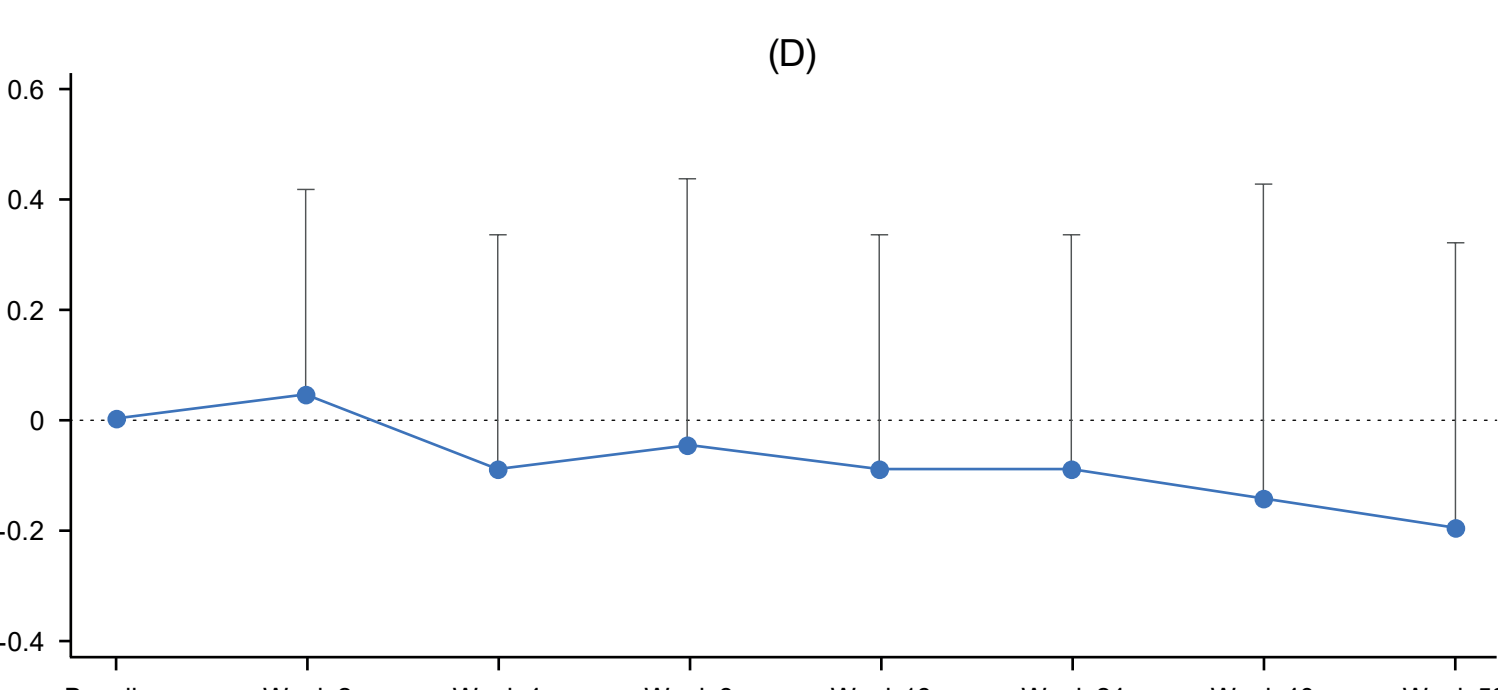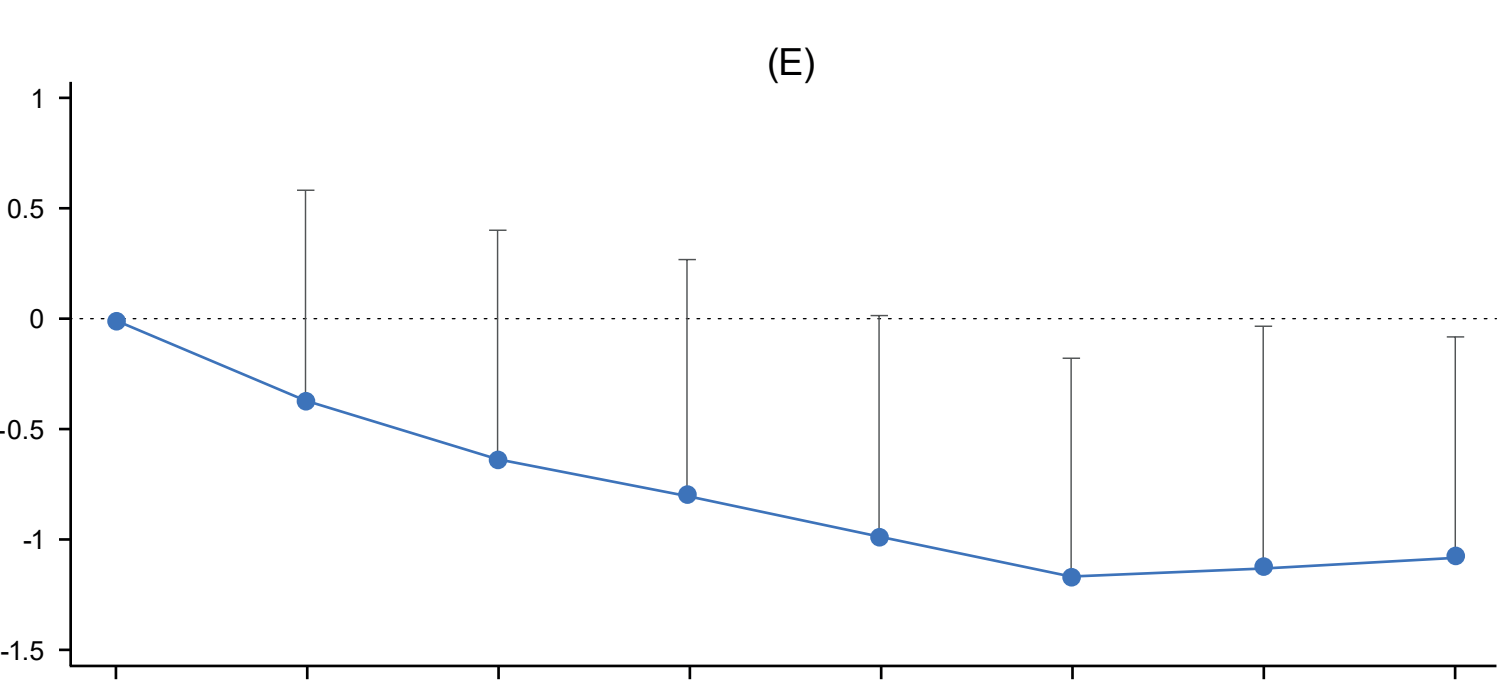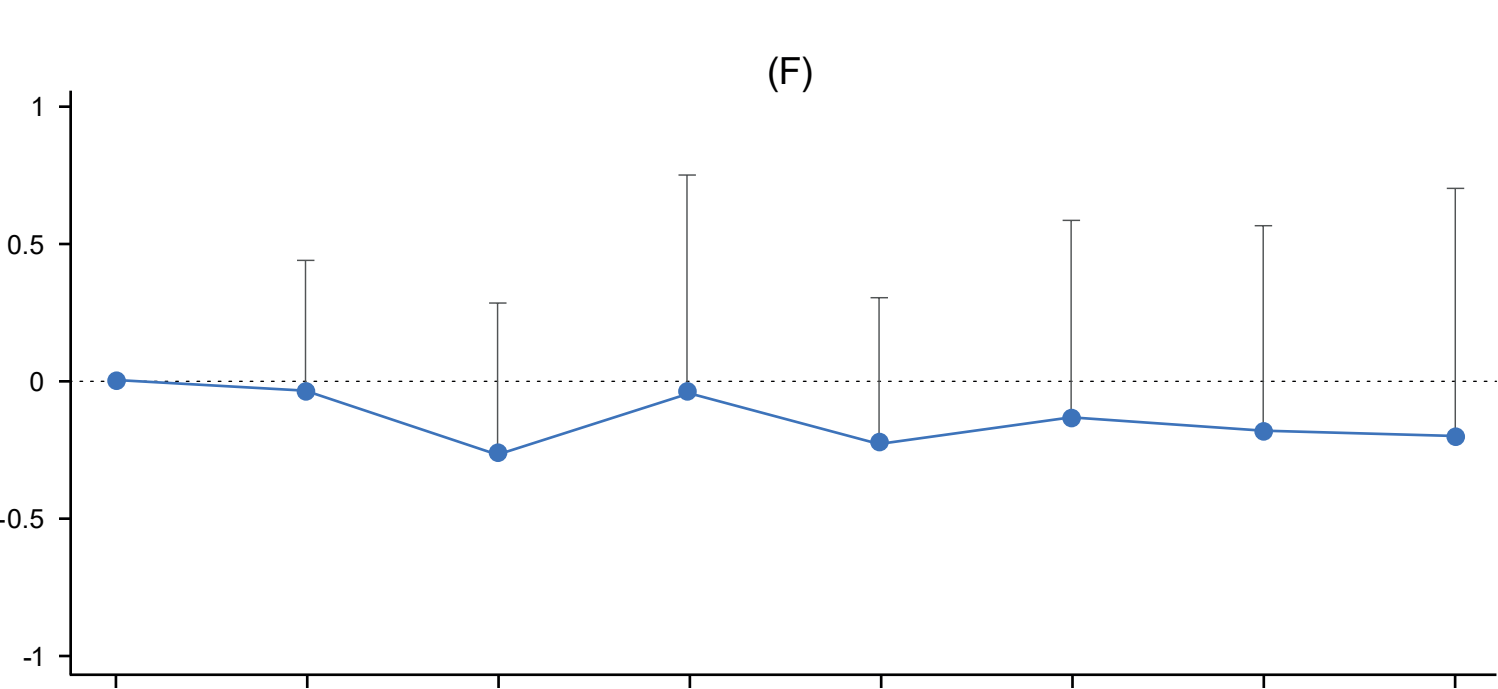

Supplement: jjac144_suppl_supplementary_figure_s2.pdf [file jjac144_suppl_supplementary_figure_s2.pdf]
