# Supplementary material for: Darvadstrocel for Complex Perianal Fistulas in Japanese Adults with Crohn’s Disease: A Phase 3 Study
Source: PubMed Central journal article supplement — J Crohns Colitis. 2022 Sep 23;17(3):369–78. doi: 10.1093/ecco-jcc/jjac144 (PMC10069615; doi:10.1093/ecco-jcc/jjac144), 2022-09-23

**Supplementary Figure 3.** Improvement in clinical remission (A), clinical response (B) and Perianal Disease Activity Index score (C) over time.

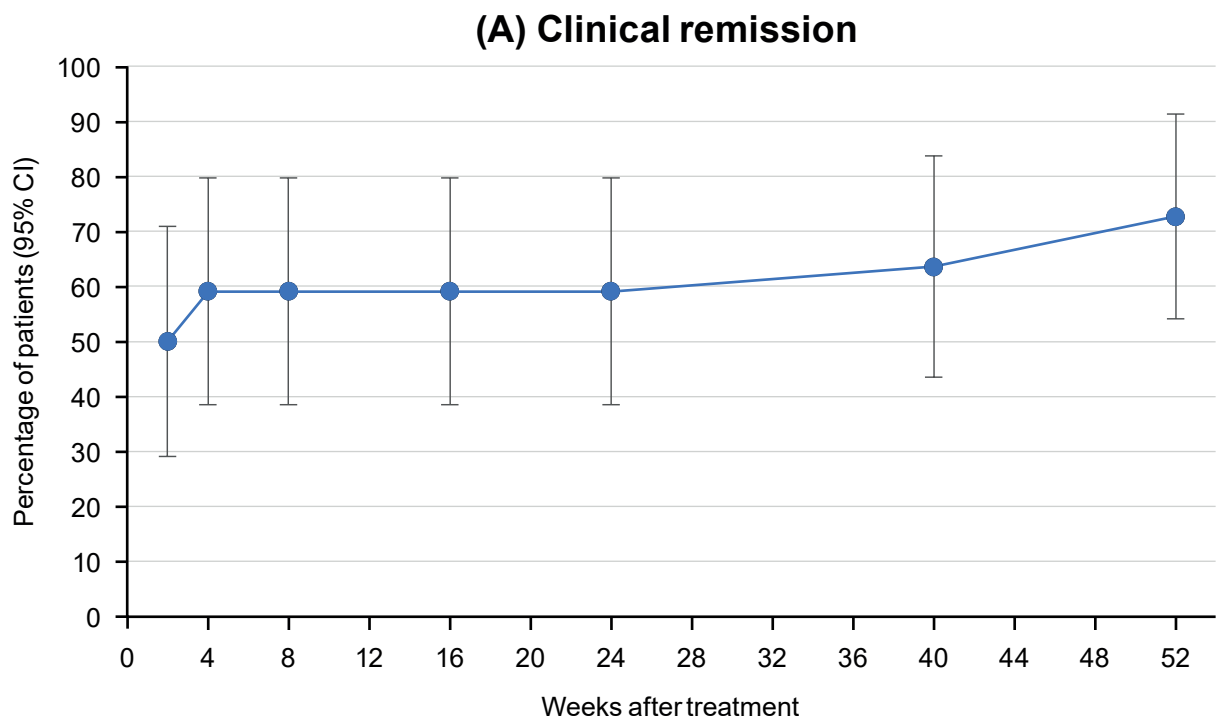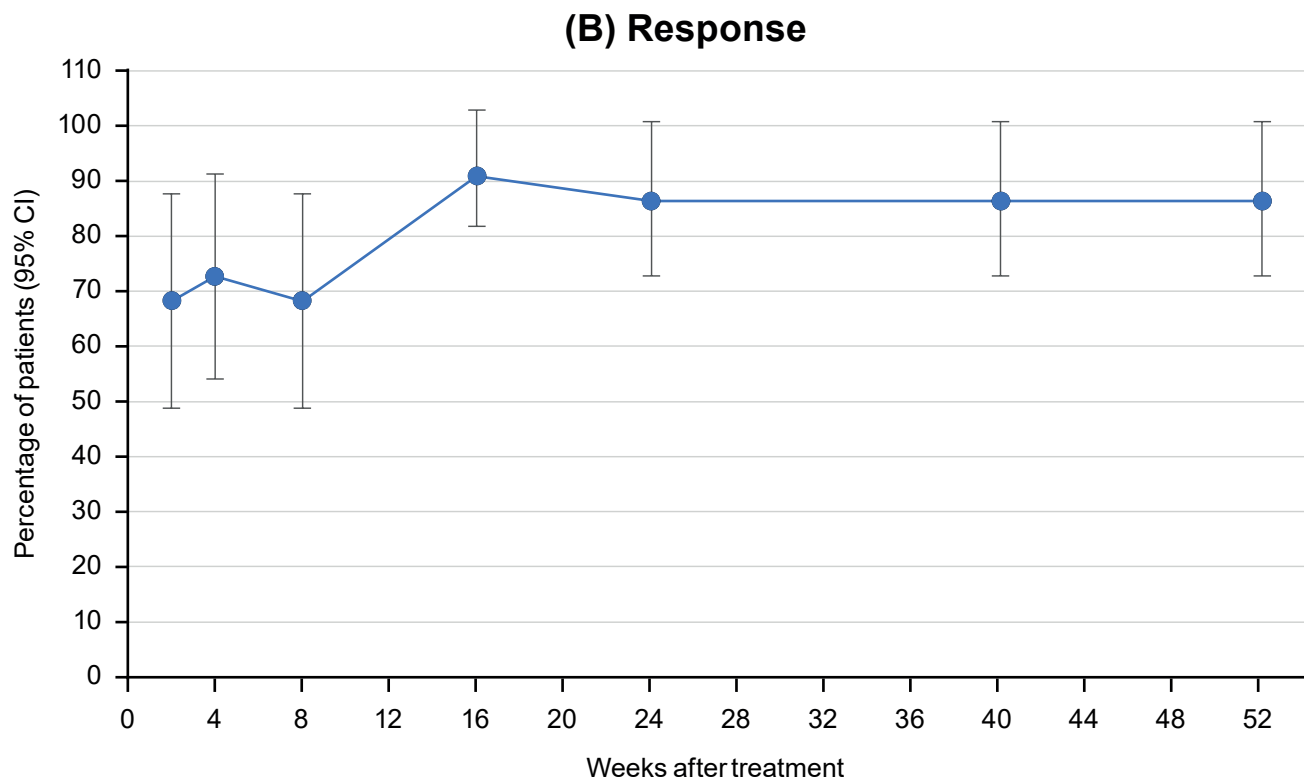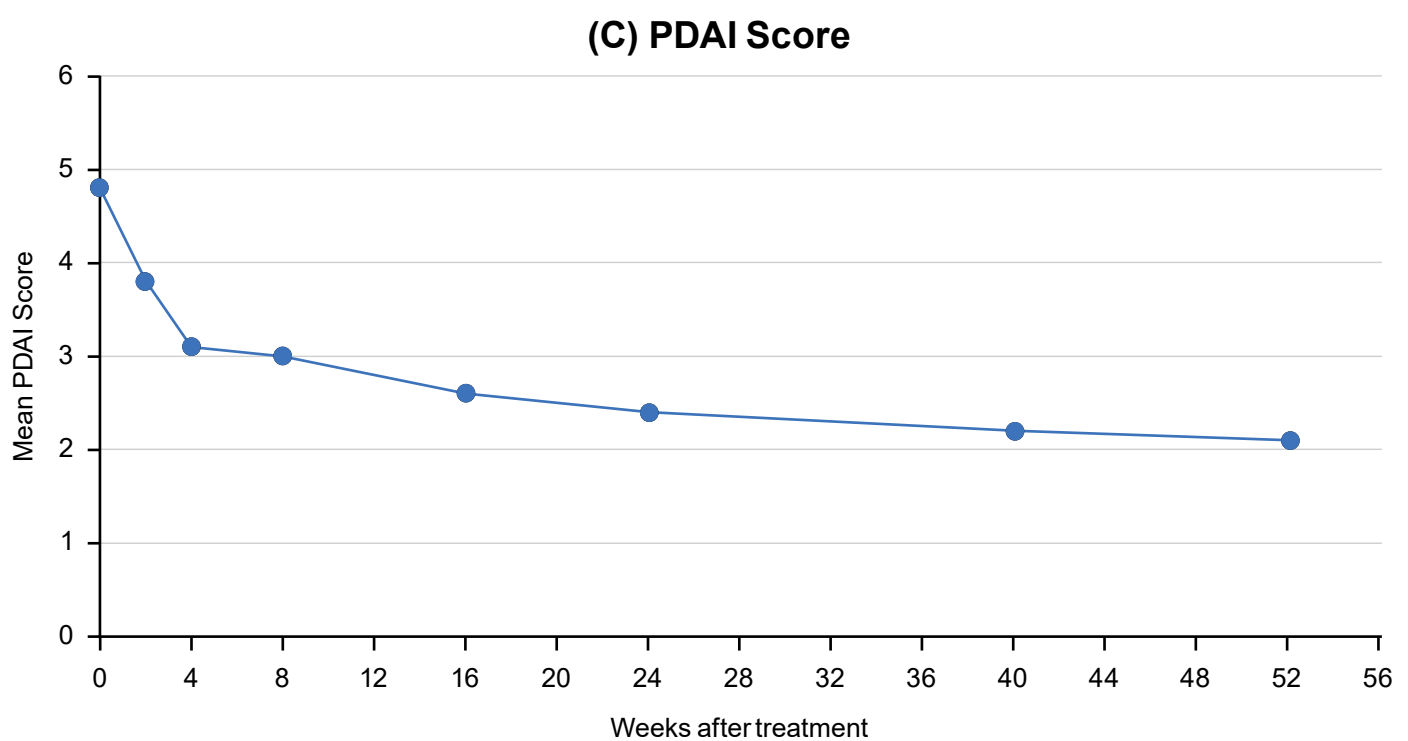

Supplement: jjac144_suppl_supplementary_figure_s3.pdf [file jjac144_suppl_supplementary_figure_s3.pdf]
