# Supplementary material for: Darvadstrocel for Complex Perianal Fistulas in Japanese Adults with Crohn’s Disease: A Phase 3 Study
Source: PubMed Central journal article supplement — J Crohns Colitis. 2022 Sep 23;17(3):369–78. doi: 10.1093/ecco-jcc/jjac144 (PMC10069615; doi:10.1093/ecco-jcc/jjac144), 2022-09-23
Supplement: jjac144_suppl_supplementary_figure_s4.pdf [file jjac144_suppl_supplementary_figure_s4.pdf]

**Supplementary Figure 4.** Representative magnetic resonance images (MRI) of complex perianal fistulas showing good healing after the darvadstrocel treatment.

Patient information: Female; duration of Crohn's disease (CD), 8 years and 9 months; treatment of CD, infliximab and azathioprine; the number of perianal fistulas, 1 internal opening and 2 external openings; combined remission at Week 24 and 52 and clinical remission and response. The total Van Assche score for baseline and post-treatment at Weeks 24 and 52 were 11, 7 and 7.

The sequence of MRI: axial T2-weighted fast spin echo.

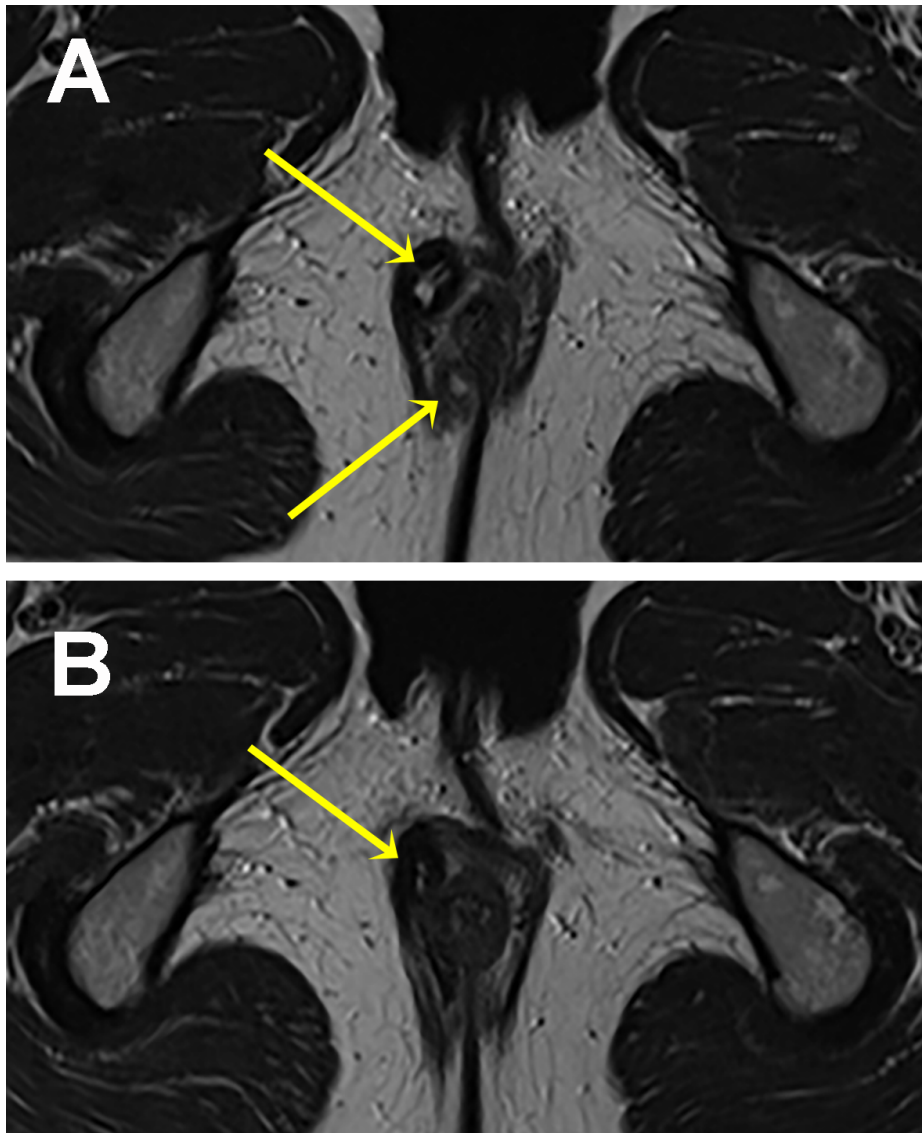

**Pre-treatment image (A);** As indicated by the arrows, 2 inflammatory fistula tracts can be identified, ventral and dorsal. They have been identified as branched fistulas that diverge from 1 internal opening.

**Post-treatment at Week 24 image (B);** Although the fistula tract on the ventral side was not completely closed (indicated by arrow), suppression of inflammation and decrease in infected granulation tissues were confirmed compared to pre-treatment. Conversely, the fistula tract on the dorsal side showed complete closure. Complete resolution of inflammation and fibrosis of the fistula tract wall was presumed.
